# Supplementary material for: Characterization of guinea pig T cell responses elicited after EP-assisted delivery of DNA vaccines to the skin
Source: PubMed Central journal article supplement (PMC5221502; doi:10.1016/j.vaccine.2016.11.052), 2016-11-25
Supplement: NIHMS838001-supplement-Supplemental_files.pdf [file NIHMS838001-supplement-Supplemental_files.pdf]

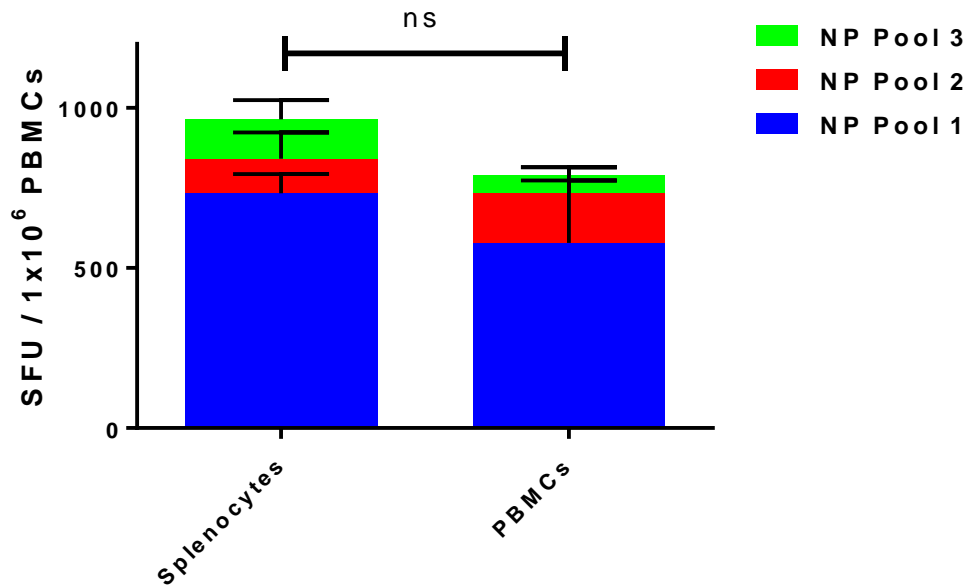

Supplemental Figure 1.

*IFN- $\gamma$  ELISpot responses in the splenocyte and PBMC populations of pNP-immunized Guinea Pigs.*

Splenocytes and PBMCs were harvested from Guinea pigs after immunization with pNP, and stimulated with Influenza NP antigen peptide Pools 1 to 3. Mean (+/-SEM) IFN- $\gamma$  SFU's for a group of 5 pNP-immunized guinea pigs are plotted.

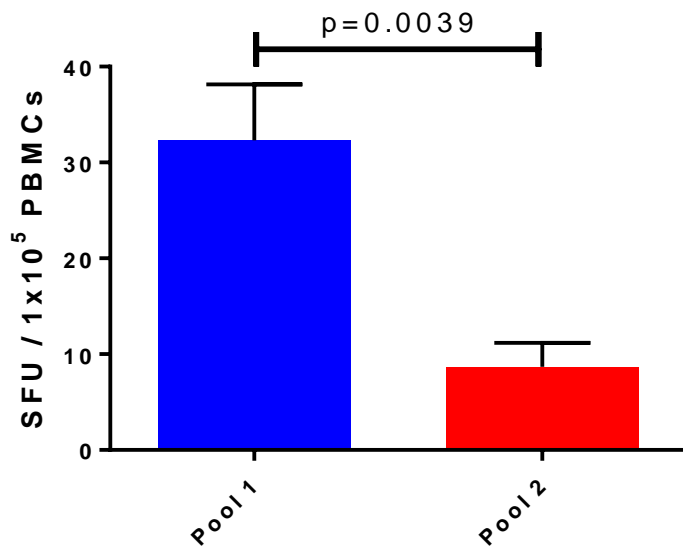

Supplemental Figure 2.

*PBMC IFN- $\gamma$ + ELISpot responses to RSV-F antigen peptide Pools 1&2.*

PBMCs were harvested from Guinea pigs after immunization with pRSV-F, and stimulated with RSV-F antigen peptide Pool 1 or 2. Mean (+/-SEM) IFN- $\gamma$  SFU's for a group of 5 pRSV-F immunized guinea pigs are plotted.
